# Supplementary material
Source: PubMed Central journal article supplement (PMC4762026)
Supplement: NIHMS756866-supplement-1-4.pdf [file NIHMS756866-supplement-1-4.pdf]

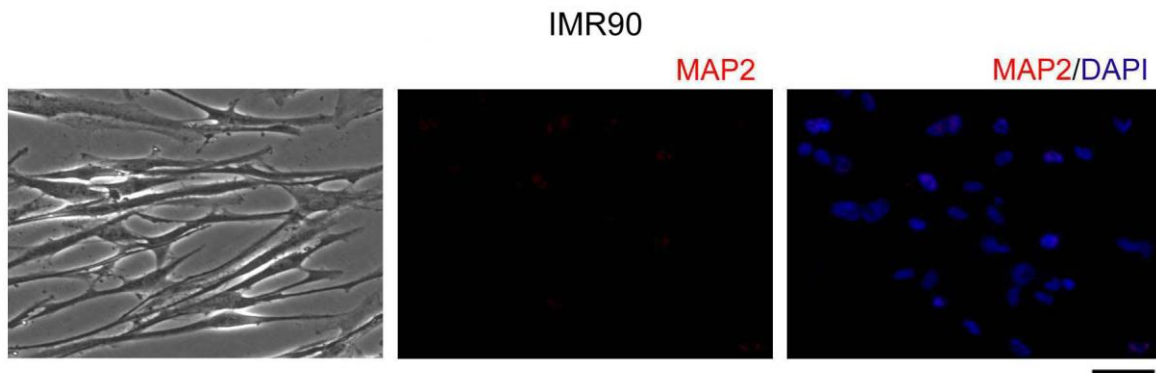

**Supplementary Fig. 1. Wild-type IMR90 cells still keep fibroblast morphology.** Morphology and immunostaining for IMR90 fibroblasts 4 weeks after induction. Wild-type IMR90 cells still kept fibroblast morphology and negative staining for MAP2. Scale bar, 10  $\mu$ m.

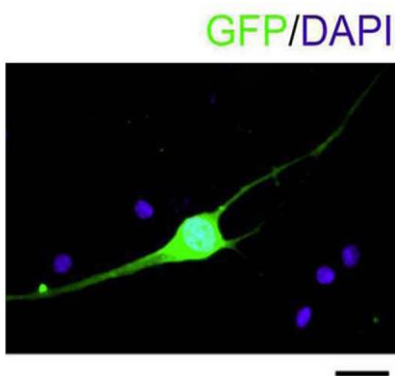

**Supplementary Fig. 2. Co-culture of induced IMR90 cells with primary rat neurons.** IMR90 cells expressing GFP and shp19 were induced for 7 days and were placed onto a monolayer culture of primary rat neurons. iN cells were identified by GFP fluorescence 2 weeks after induction. Scale bar, 10  $\mu$ m.

miRNA9-124+Ascl1/Myt11/Neurod2

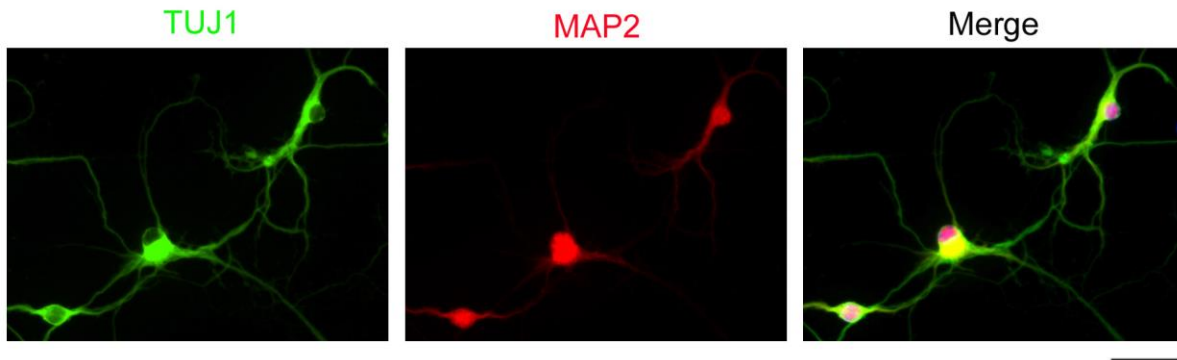

**Supplementary Fig. 3. Expression of miRNA9-124+Ascl1/Myt11/Neurod2 in IMR90 cells induces their conversion into neuron.** The images show the immunostaining of the iN cells by expression of the miRNA9-124+Ascl1/Myt11/Neurod2 3 weeks after induction. Scale bar, 10  $\mu$ m.

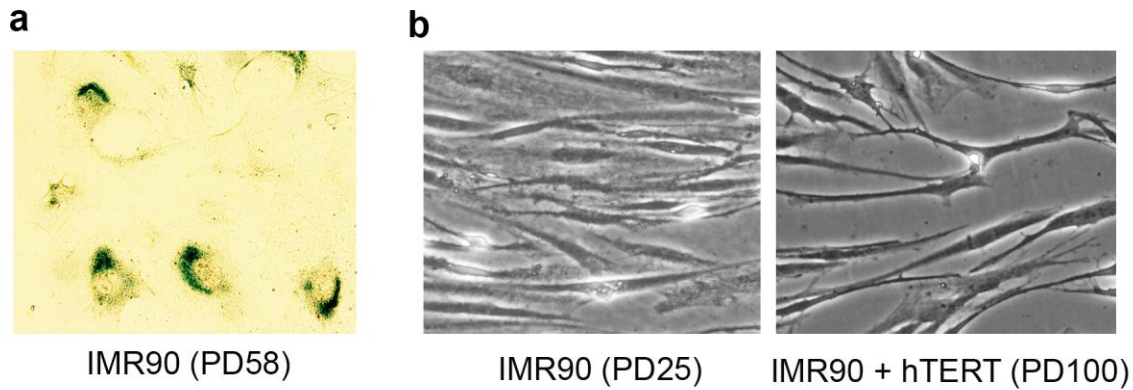

**Supplementary Fig. 4. Overexpression of hTERT overcomes cellular senescence.** a. IMR90 cells at passage 58 show senescence morphology with SA- $\beta$ -Gal positive staining. b. The images show different passages of IMR90 and hTERT IMR90 cells.
